1 Naturally Produced Lovastatin Modifies the Histology and Proteome Profile of  
2 Goat Skeletal Muscle

3

4 Short title: Naturally produced lovastatin on histology and proteome profile

5

6 Teik Kee Leo<sup>1</sup>, Sani Garba<sup>1</sup>, Danmaigoro Abubakar<sup>2</sup>, Awis Qurni Sazili<sup>1,3</sup>, Su  
7 Chui Len Candyrine<sup>4</sup>, Mohammad Faseleh Jahromi<sup>5</sup>, Yong Meng Goh<sup>1,2</sup>, Ron  
8 Ronimus<sup>6</sup>, Stefan Muetzel<sup>6</sup>, Juan Boo Liang<sup>1\*</sup>

9

10 <sup>1</sup>Institute of Tropical Agriculture and Food Security, Universiti Putra Malaysia,  
11 Serdang, Selangor, Malaysia

12 <sup>2</sup>Faculty of Veterinary Medicine, Universiti Putra Malaysia, Serdang, Selangor,  
13 Malaysia

14 <sup>3</sup>Faculty of Agriculture, Universiti Putra Malaysia, Serdang, Selangor, Malaysia

15 <sup>4</sup>Faculty of Sustainable Agriculture, Universiti Malaysia Sabah, Sandakan,  
16 Sabah, Malaysia

17 <sup>5</sup>Agricultural Biotechnology Research Institute of Iran, Mashad, Iran

18 <sup>6</sup>Rumen Microbiology, AgResearch, Palmerston North, New Zealand

19

20 \*Corresponding author

21 E-mail: [jbliang@upm.edu.my](mailto:jbliang@upm.edu.my) (JBL)

## 23 **Abstract**

24 Enteric methane formation in ruminants is one of the major contributors to  
25 climate change. We have reported that supplementation of naturally produced  
26 lovastatin reduced methane emissions in goats without adversely affecting  
27 rumen fermentation and animal performance, except that at higher level,  
28 lovastatin can have a negative effect on the palatability of the formulated diet.  
29 As statins are associated with the development of muscle-related adverse  
30 effects at higher than recommended therapeutic doses, this study was  
31 conducted to examine the effects of lovastatin on the histology and proteome  
32 profile of goat skeletal muscle. A total of 20 intact male Saanen goats were  
33 randomly assigned in equal numbers to 4 groups, and fed with a total mixed  
34 ration containing 50% rice straw, 22.8% concentrates and 27.2% of various  
35 proportions of untreated or treated palm kernel cake (PKC) to achieve the target  
36 daily intake levels of 0 (Control), 2 (Low), 4 (Medium) or 6 (High) mg  
37 lovastatin/kg body weight (BW). Histological examination discovered that the  
38 longissimus thoracis et lumborum muscle of animals from the Medium and High  
39 treatment groups showed abnormalities in terms of necrosis, degeneration,  
40 interstitial space and vacuolation. Western blot analysis conducted on the  
41 myosin heavy chain showed that the immunoreactivity of myosin heavy chain in  
42 the High treatment group was significantly lower than the Control, Low and  
43 Medium treatment groups. Comparisons between control and lovastatin-treated  
44 groups demonstrated that lovastatin supplementation induced complex  
45 modifications to the protein expression patterns of the longissimus thoracis et  
46 lumborum muscle of the goat. There were 30, 26 and 24 proteins differentially  
47 expressed in Low, Medium and High treatment groups respectively, when

48 compared to the Control group. Supplementation of lovastatin down-regulated  
49 proteins involved in carbohydrate and creatine metabolism, indicative of  
50 reduced energy production, and may have contributed to the skeletal muscle  
51 damage. Supplementation of naturally produced lovastatin induced muscle  
52 damage in longissimus thoracis et lumborum muscle of goats with increasing  
53 dosages, particularly at 6mg/kg BW. In addition, proteomics analysis revealed  
54 that lovastatin supplementation induced complex modifications to the protein  
55 expressions of skeletal muscle of goats which may have contributed to the  
56 observed skeletal muscle damage. Present study suggested that  
57 supplementation of naturally-produced lovastatin at 6mg/kg BW could adversely  
58 affecting health and wellbeing of the animals.

59

## 60 **Introduction**

61 Methane gas is one of the major greenhouse gases that is contributing to  
62 climate change. Livestock production has been reported to contribute  
63 approximately 18% of methane emissions and 9% of carbon dioxide production  
64 [1], which results primarily from the enteric fermentation of feeds [2]. Enteric  
65 methane formation results from the activity of complex interactions of anaerobic  
66 bacteria which together enable degradation of ruminant feeds and  
67 methanogenic archaea which help remove metabolic hydrogen in the rumen [3].  
68 Despite the importance of methanogenesis in maintaining low partial pressure  
69 of hydrogen required for efficient ruminal fermentation, the formation of  
70 methane also represents 2-12% loss of gross dietary energy [4]. Hence,  
71 extensive research efforts are focused on the development of strategies to

72 modify ruminal fermentation for reduction of methane emissions [5] as well as  
73 better feed utilization [6].

74

75 Among the potential strategies for mitigating methane emissions,  
76 supplementation of feed additives such as ionophores [7], organic acids [8],  
77 fatty acids [9], methyl coenzyme M reductase inhibitors [10], vaccine [11] and  
78 oils [12] have been extensively researched. However, many of these strategies  
79 have limited application due to their negative effect(s) on human and animal  
80 health, animal performance parameters and economical acceptance [13].  
81 Supplementation of naturally produced lovastatin is a promising approach for  
82 mitigating methane emissions.

83

84 Lovastatin (C<sub>24</sub>H<sub>36</sub>O<sub>5</sub>, M.W. 404.55) is a secondary product during the  
85 secondary phase (idiophase) of fungal growth. It is a competitive inhibitor of 3-  
86 hydroxy-3-methylglutaryl coenzyme A (HMG-CoA) reductase, which is a key  
87 enzyme in the cholesterol production pathway [14]. Inhibition of HMG-CoA  
88 reductase will mediate the suppression of cholesterol synthesis and cell  
89 membrane formation in methanogenic Archaea. A previous study has shown  
90 that significant reduction in growth and activity of methanogenic Archaea using  
91 lovastatin without any negative effect on cellulolytic bacteria [15]. In addition,  
92 naturally produced lovastatin has been shown to mitigate methane gas  
93 emissions, while simultaneously enhancing digestibility of feed [16].

94

95 A previous study has reported the effects of naturally produced lovastatin from  
96 fermented-*Monascus purpureus* red rice powder on cattle [17]. High dose of

97 fermented-Monascus purpureus red rice powder (100g/day and above)  
98 supplementation adversely affected dry matter intake and ruminant physiology.  
99 We have recently reported that supplementation of naturally produced lovastatin  
100 in goats as being capable of mitigating methane emissions effectively without  
101 adversely affecting digestion and rumen fermentation, except that animals fed  
102 the highest level (6 mg/kg BW) had lower appetite [18]. Statins have been  
103 associated with the development of muscle-related adverse effects, however  
104 the effects of lovastatin on the skeletal muscle in goats have not been studied.  
105 Therefore, this follow-up study was conducted to examine the effects of  
106 lovastatin on the histology and proteome profile of the goat skeletal muscle from  
107 the above study to further elucidate whether supplementation of lovastatin  
108 affects the health and wellbeing of the goats.

109

## 110 **Material and Methods**

### 111 **Animals and management**

112 This study was approved by the Animal Care and Ethics Committee of the  
113 Universiti Putra Malaysia (UPM/IACUC/AUP-R0087/2015). Detail protocols of  
114 the study have been reported [18]. Briefly, twenty intact male Saanen goats of 4-  
115 5 months old with average live weight of  $26 \pm 3.4$  kg were used in the 12-week  
116 feeding trial. The animals were randomly assigned in equal numbers and fed a  
117 total mixed ration containing 50% rice straw, 22.8% concentrates and 27.2% of  
118 various proportions of untreated or treated PKC to achieve the target daily  
119 intake level of 0 (Control), 2 (Low), 4 (Medium) or 6 (High) mg lovastatin/kg BW.

120 The lovastatin was produced by solid state fermentation using PKC (palm  
121 kernel cake) and *Aspergillus terreus* (ATCC 74135) [18].

122

## 123 **Slaughtering and sample collection**

124 At the end of feeding trial, the animals were humanely slaughtered according to  
125 the standard protocol of halal (Muslim) slaughtering (MS1500:2009).  
126 Immediately after skin removal and evisceration, longissimus thoracis et  
127 lumborum muscle was collected from each animal. The muscle samples  
128 collected for histology analysis were rinsed with normal saline solution before  
129 fixing in 10% PBS buffered formalin solution. Muscle samples were snapped  
130 frozen with liquid nitrogen for proteomics analysis and kept in -80°C until further  
131 analysis.

132

## 133 **Histology**

134 Muscle samples were removed from the formalin solution, dehydrated in an  
135 increasing ethanol series and routinely processed for paraffin embedding. The  
136 samples were sectioned at 5µm and stained with haematoxylin-eosin. From  
137 each muscle, five locations were sectioned and each location was mounted on  
138 a slide. and viewed with a Leica DM LB2 upright light microscope (Leica  
139 microsystems Wetzlar GmbH, Wetzlar, Germany). Three images were captured  
140 from each slide under 20 × magnification using a Leica DFC320 digital camera  
141 connected to a computer which was controlled with Leica IM50 v4.0 software  
142 (Leica microsystems Wetzlar GmbH, Wetzlar, Germany).

143

144 The muscle tissues were evaluated for evidence of necrosis, degeneration,  
145 interstitial space and vacuolization. Numerical scores were assigned based on  
146 degree of severity (0 = normal to 5 = severe) according to Gall et al. [19] (Table  
147 1). Histological scores between every treatment groups were compared using  
148 Kruskal-Wallis test. Statistical confidence was considered as  $P < 0.05$ .

149

150 **Table 1. Scoring system used in histological analysis on *longissimus***  
151 ***thoracis et lumborum* muscle of goats supplemented with naturally**  
152 **produced lovastatin.**

| Score | Histopathologic injury | Percentage |
|-------|------------------------|------------|
| 0     | Normal                 | 0%         |
| 1     | Minimal                | <15%       |
| 2     | Mild                   | ≤25%       |
| 3     | Moderate               | ≤ 40%      |
| 4     | Marked                 | ≥50        |

153

## 154 **Immunoblot analysis of myofibrillar proteins**

155 All muscle samples were pulverized into powder form with pestle and mortar  
156 using liquid nitrogen. Myofibrillar proteins were extracted according to Morzel et  
157 al. [20] with slight modifications. Approximately 100mg of muscle powder was  
158 mixed with 1ml of extraction buffer containing 150mM NaCl, 25mM KCl, 3mM  
159 MgCl<sub>2</sub>, 4mM EDTA and 5μl of protease inhibitor (Calbiochem®) at pH6.5. The  
160 mixture was vortexed for 30s before centrifuging at 500rpm for 5 min. After that,  
161 the supernatant was transferred to a new tube, and centrifuged again at 4340  
162 rpm for 15 mins at 4°C. The resulting pellet was washed twice with 1ml of

163 50mM KCl solution at pH6.4 and once with 1ml of 20mM phosphate buffer at  
164 pH6. The pellet was eventually suspended in Tris-SDS buffer.

165

166 The extracted myofibrillar proteins were separated by sodium dodecyl sulphate-  
167 polyacrylamide gel electrophoresis (SDS-PAGE) [21]. The proteins were mixed  
168 with sample loading buffer (62.5mM Tris-HCl at pH6.8, 25% glycerol, 2% SDS,  
169 0.01% (w/v) bromophenol blue and 5%  $\beta$ -mercaptoethanol) at ratio of 1: 5 and  
170 incubated at 94°C for 5 min. For myosin heavy chain, the proteins were  
171 separated with 4% stacking and 5% resolving gels. Whilst, other proteins were  
172 separated with 4% stacking and 12% resolving gels for troponin T. The SDS-  
173 PAGE was conducted at a constant current of 15mA/gel for 15 min, followed by  
174 20mA/gel until the bromophenol blue dye reached the bottom of the gel.

175

176 Following electrophoresis, the gel was equilibrated in the transfer buffer (25mM  
177 Tris, 192mM glycine and 20% (v/v) methanol at pH 8.3) for 10 min before  
178 blotted for 2 hr at 250mA with voltage limit of 25 V onto a polyvinylidene  
179 difluoride membrane. Membranes were blocked with 5% bovine serum albumin  
180 in TBST buffer (100mM Tris-HCl, 150mM NaCl, 0.05% Tween 20 and 0.05%  
181 SDS) overnight and incubated with primary antibody. For myosin heavy chain,  
182 the membranes were incubated with 1:500 dilution of monoclonal anti-myosin  
183 (skeletal, fast) (M4276, Sigma-Aldrich, USA) and monoclonal anti-myosin  
184 (skeletal, slow) (M8421, Sigma-Aldrich, USA) antibodies in 3% BSA in TBST  
185 buffer. Monoclonal anti-troponin-T antibody (T6277, Sigma-Aldrich, USA) was  
186 used as the primary antibody for troponin-T. After that, the membranes were  
187 washed with TBST buffer for three times and subsequently incubated in



188 1:10,000 dilution of secondary antibody (anti-mouse IgG whole molecule  
189 conjugated with alkaline phosphatase) (A3562, Sigma-Aldrich, USA). The  
190 membranes were then washed with TBST buffer for three times and detected  
191 using AP detection kit (Bio-Rad, USA). Protein bands were visualized using Gel  
192 DocTM XR+ System (Bio-Rad, USA) and quantified with Image LabTM software  
193 (Bio-Rad, USA).

194

195 The difference in the band intensity of myosin heavy chain and actin amongst  
196 the treatment groups were determined statistically using one-way analysis of  
197 variance (ANOVA) at 95% confidence level. The data analysis was conducted  
198 using SAS software (version 9.1, SAS Inst. Inc., U.S.A.). The data is presented  
199 as means  $\pm$  standard error of means (S.E.M.).

200

## 201 **Liquid chromatography mass spectrometry**

202 Crude protein was extracted from each muscle sample. Briefly, 0.2 g of muscle  
203 sample in powder form was mixed with 1ml of cold buffer containing 100mM  
204 Tris, pH 8.3 and 10  $\mu$ l protease inhibitor (Calbiochem®). The samples were  
205 mixed thoroughly with vortex for 30s and centrifuged at 4°C for 20min at  
206 15,000 g. The supernatant was carefully collected and the concentration was  
207 determined using the Bradford assay [22].

208

209 Each protein sample (100 $\mu$ g) was reduced with 50mM DTT at 60°C for 60min  
210 and alkylated with 50mM iodoacetamide in the dark for 45 min at room  
211 temperature. Then, proteins were diluted with 50mM ammonium bicarbonate  
212 and digested with trypsin at 37°C overnight. The digestion process was

213 stopped by adding 0.5% formic acid. Digested peptides were desalted using  
214 C18 ZipTip pipette tips (Millipore, Billerica, USA) according to the supplier's  
215 instructions, and resuspended in 0.1% formic acid.

216

217 The purified digested peptides were separated with reverse phase liquid  
218 chromatography using a Dionex Ultimate 3000 RSLCnano system (Thermo  
219 Fisher Scientific) and analyzed by tandem mass spectrometry using Orbitrap  
220 Fusion mass spectrometry (Thermo Fisher Scientific). Peptide samples (20 µl)  
221 were separated on the EASY-Spray Column Acclaim PepMap™ C18 100A  
222 (2 µm particle size, 50 µm id × 25cm; Thermo Fisher Scientific) by a gradient  
223 from 5% to 40% of buffer B (0.1% formic acid in acetonitrile) at 300nL/min flow  
224 over 91 min. The remaining peptides were eluted by a short gradient from 40%  
225 to 95% buffer B in 2 min.

226

227 The eluting peptides were analyzed using tandem mass spectrometry using  
228 Orbitrap Fusion mass spectrometry. Full scan spectra were collected using the  
229 following parameters: scan range 310-1800 m/z, resolving power of 120,000,  
230 AGC target of 4.0 e5 (400,000), and maximum injection time of 50 ms. The  
231 method consisted of 3 s Top Speed Mode where precursors were selected for a  
232 maximum 3 s cycle. Only precursors with an assigned monoisotopic m/z and a  
233 charge state of 2 – 7 were further analyzed for MS2. All precursors were filtered  
234 using a 20 second dynamic exclusion window and intensity threshold of 5000.  
235 The MS2 spectra were analyzed using the following parameters: rapid scan rate  
236 with a resolving power of 60,000, AGC target of 1.0e2 (100), 1.6 m/z isolation

237 window, and a maximum injection time of 250 ms. Precursors were fragmented  
238 by CID and HCD at normalized collision energy of 30% and 28%.

239

240 The raw data obtained was analyzed using Thermo Scientific™ Proteome  
241 Discoverer™ Software Version 2.1 (Thermo Fisher Scientific) with searching  
242 database of goat (*Capra hircus*) and mammalian downloaded from UniProt. The  
243 parameters for searching were set as follows: missed cleavage: 2; MS1  
244 tolerance: 10ppm; MS2 tolerance: 0.6Da; variable modification: oxidation (M),  
245 deamidation of asparagine (N) and glutamine (Q); and fixed modification:  
246 carbamidomethyl (C). All peptides were validated using the percolator©  
247 algorithm based on q-value less than 1% false discovery rate.

248

249 Quantitative analysis of the data was analyzed using Perseus version 1.6.0.2 to  
250 identify the differentially expressed proteins in the muscle between the control  
251 and lovastatin-treated groups. Pair-wise comparison between control and each  
252 lovastatin-treated group was conducted using Student T-test. Gene ontology  
253 enrichment analysis and functional annotation of the identified proteins were  
254 performed using Database for Annotation, Visualization and Integrated  
255 Discovery (DAVID) version 6.8 (<https://david.ncifcrf.gov>) [23]. In addition, the  
256 cell and molecular functions and canonical pathways of these proteins were  
257 identified using Ingenuity® Pathway Analysis (IPA®) (Qiagen, Germany).

258

## 259 **Results**

### 260 **Histology**

261 The histological examinations showed that skeletal muscle of animals  
262 supplemented with lovastatin suffered from light to moderate damage (Figure  
263 1). Mild haemorrhage was observed in the Medium treatment group while  
264 skeletal muscle of the High treatment group showed relatively severe  
265 degeneration as compared to other treatment groups. Descriptive data for each  
266 group is shown in Table 2. The Kruskal-Wallis test showed a significant  
267 difference among the four groups. It was observed that the muscle of the  
268 Control group was normal, with no signs of any degeneration. The scores of  
269 necrosis, interstitial space and vacuolization of the Low treatment group were  
270 similar ( $P>0.05$ ) to the Control group, except the score of degeneration  
271 ( $P<0.05$ ). When the Medium and High treatment groups compared with the  
272 Control group, the scores of degeneration, necrosis, interstitial space and  
273 vacuolization were significantly different ( $P<0.05$ ). The scores of necrosis,  
274 interstitial space and vacuolization, but not of degeneration of Low treatment  
275 group, were significantly different ( $P<0.05$ ) with Medium treatment group. When  
276 comparing the Medium and High treatment groups, only the scores of necrosis  
277 and degeneration were significantly different ( $P<0.05$ ) between both groups.

278

279 **Fig 1. Histological analysis on longissimus thoracis et lumborum muscle**  
280 **of goats supplemented with naturally produced lovastatin.**

281 Control, Low, Medium and High represent 0, 2, 4 and 6 mg lovastatin/kg BW,  
282 respectively.

283 Mild haemorrhage was observed in the Medium treatment group. Skeletal  
284 muscle of High treatment group showed relatively severe degeneration as  
285 compared to other treatment groups.

286 **Table 2. Histology scores of *longissimus thoracis et lumborum* muscle of goats supplemented with naturally produced**  
 287 **lovastatin.**

| Parameters         | Control        |     |     | Low            |     |     | Medium         |     |     | High           |     |     |
|--------------------|----------------|-----|-----|----------------|-----|-----|----------------|-----|-----|----------------|-----|-----|
|                    | Median         | Min | Max | Median         | Min | Max | Median         | Min | Max | Median         | Min | Max |
| Necrosis           | 0 <sup>a</sup> | 0   | 0   | 0 <sup>a</sup> | 0   | 0   | 1 <sup>b</sup> | 0   | 2   | 3 <sup>c</sup> | 1   | 4   |
| Degeneration       | 0 <sup>a</sup> | 0   | 0   | 0 <sup>b</sup> | 0   | 1   | 0 <sup>b</sup> | 0   | 2   | 2 <sup>c</sup> | 0   | 3   |
| Interstitial space | 0 <sup>a</sup> | 0   | 0   | 0 <sup>a</sup> | 0   | 0   | 1 <sup>b</sup> | 0   | 3   | 1 <sup>b</sup> | 0   | 3   |
| Vacuolation        | 0 <sup>a</sup> | 0   | 0   | 0 <sup>a</sup> | 0   | 0   | 1 <sup>b</sup> | 0   | 2   | 1 <sup>b</sup> | 0   | 3   |

288 Control, Low, Medium and High represent 0, 2, 4 and 6 mg lovastatin/kg BW, respectively.

289 Data was presented as the median, minimum and maximum of the score.

290 <sup>abc</sup> = Score within a row with different superscripts differ significantly at p<0.05.

291

292

## 293 **Expressions of myosin heavy chain and actin**

294 The difference in the immunoreactivities of myosin heavy chain and actin of  
295 longissimus thoracis et lumborum muscle in the goats supplemented with  
296 various lovastatin levels is presented in Table 3. There were significant  
297 differences in the expression of myosin heavy chain between the treatment  
298 groups, while the expression of actin was found to be unaffected by lovastatin  
299 supplementation. The immunoreactivities of myosin heavy chain in the High  
300 treatment group were significantly lower than the Control, Low and Medium  
301 treatment groups. In contrast, the immunoreactivities of myosin heavy chain  
302 were similar between the Control, Low and Medium treatment groups.

303

304

## 305 **Expressions of myosin heavy chain and actin**

306 The difference in the immunoreactivities of myosin heavy chain and actin of  
307 longissimus thoracis et lumborum muscle in the goats supplemented with  
308 various lovastatin levels is presented in Table 3. There were significant  
309 differences in the expression of myosin heavy chain between the treatment  
310 groups, while the expression of actin was found to be unaffected by lovastatin  
311 supplementation. The immunoreactivities of myosin heavy chain in the High  
312 treatment group were significantly lower than the Control, Low and Medium  
313 treatment groups. In contrast, the immunoreactivities of myosin heavy chain  
314 were similar between the Control, Low and Medium treatment groups.

315

316 **Table 3. Differences in immunoreactivities of myosin heavy chain and**  
317 **actin in *longissimus thoracis et lumborum* muscle of goats supplemented**  
318 **with naturally produced lovastatin.**

| Protein            | Control                | Low                    | Medium                 | High                   |
|--------------------|------------------------|------------------------|------------------------|------------------------|
| Myosin heavy chain | 0.36±0.01 <sup>a</sup> | 0.36±0.00 <sup>a</sup> | 0.36±0.01 <sup>a</sup> | 0.35±0.00 <sup>b</sup> |
| Actin              | 0.38±0.00 <sup>a</sup> | 0.39±0.00 <sup>a</sup> | 0.39±0.00 <sup>a</sup> | 0.38±0.00 <sup>a</sup> |

319 Control, Low, Medium and High represent 0, 2, 4 and 6 mg lovastatin/kg BW,  
320 respectively.

321 <sup>ab</sup> Mean within a row with different superscripts differ significantly at p<0.05.

322

### 323 **Differentially expressed proteins**

324 The present study identified approximately 400 proteins in the  
325 *longissimus thoracis et lumborum* muscle of goat. Comparisons between control  
326 and lovastatin-treated groups demonstrated that lovastatin supplementation  
327 induced complex modifications to the protein expression patterns in the  
328 *longissimus thoracis et lumborum* muscle of the goat. When the Low treatment  
329 and Control groups were compared, there were 25 proteins down-regulated and  
330 five proteins up-regulated in the Low treatment group (Table 4). When the  
331 Medium treatment and Control groups were compared, 21 proteins were  
332 observed to be down-regulated and five proteins up-regulated (Table 5). When  
333 the Control and High treatment groups were compared, 23 proteins were down-  
334 regulated and one protein was up-regulated in the muscle tissue (Table 6).

335

336 **Table 4. Differentially expressed proteins in *longissimus thoracis et lumborum* muscle of goats supplemented with 2mg**  
 337 **lovastatin/ kg body weight.**

| UniProt<br>Accession           | Description                                 | Species                          | Coverage | # Unique<br>Peptides | # AAs <sup>1</sup> | MW <sup>2</sup><br>[kDa] | calc.<br>pI <sup>3</sup> | Control | Low   | -Log<br>p-value | Difference <sup>4</sup> |
|--------------------------------|---------------------------------------------|----------------------------------|----------|----------------------|--------------------|--------------------------|--------------------------|---------|-------|-----------------|-------------------------|
| <i>Carbohydrate metabolism</i> |                                             |                                  |          |                      |                    |                          |                          |         |       |                 |                         |
| P06733                         | Alpha-enolase                               | <i>Homo sapiens</i>              | 24.65    | 3                    | 434                | 47.14                    | 7.39                     | 30.04   | 23.77 | 5.68            | -6.27                   |
| P00883                         | Fructose-bisphosphate aldolase<br>A         | <i>Oryctolagus<br/>cuniculus</i> | 59.34    | 5                    | 364                | 39.32                    | 8.09                     | 34.17   | 27.00 | 5.36            | -7.17                   |
| P05065                         | Fructose-bisphosphate aldolase<br>A         | <i>Rattus<br/>norvegicus</i>     | 50.55    | 1                    | 364                | 39.33                    | 8.09                     | 34.18   | 31.30 | 4.28            | -2.88                   |
| P52210                         | Fructose-bisphosphate aldolase<br>B         | <i>Ovis aries</i>                | 7.14     | 1                    | 364                | 39.61                    | 8.37                     | 29.14   | 24.36 | 2.42            | -4.77                   |
| P06744                         | Glucose-6-phosphate isomerase               | <i>Homo sapiens</i>              | 24.19    | 2                    | 558                | 63.11                    | 8.32                     | 30.04   | 25.54 | 3.16            | -4.50                   |
| P04406                         | Glyceraldehyde-3-phosphate<br>dehydrogenase | <i>Homo sapiens</i>              | 29.25    | 1                    | 335                | 36.03                    | 8.46                     | 31.64   | 24.20 | 3.27            | -7.44                   |
| P00355                         | Glyceraldehyde-3-phosphate<br>dehydrogenase | <i>Sus scrofa</i>                | 66.07    | 4                    | 333                | 35.81                    | 8.35                     | 34.22   | 31.64 | 1.74            | -2.58                   |
| Q5E9B1                         | L-lactate dehydrogenase B<br>chain          | <i>Bos taurus</i>                | 32.93    | 9                    | 334                | 36.70                    | 6.44                     | 32.22   | 27.15 | 3.12            | -5.07                   |



|                                                        |                                          |                                  |       |    |     |       |      |       |       |      |       |
|--------------------------------------------------------|------------------------------------------|----------------------------------|-------|----|-----|-------|------|-------|-------|------|-------|
| P36871                                                 | Phosphoglucomutase-1                     | <i>Homo sapiens</i>              | 48.40 | 2  | 562 | 61.41 | 6.76 | 30.09 | 23.34 | 3.22 | -6.75 |
| P00559                                                 | Phosphoglycerate kinase 1                | <i>Equus caballus</i>            | 48.44 | 6  | 417 | 44.57 | 8.41 | 31.73 | 28.67 | 2.62 | -3.06 |
| P15259                                                 | Phosphoglycerate mutase 2                | <i>Homo sapiens</i>              | 34.78 | 2  | 253 | 28.75 | 8.88 | 32.27 | 26.82 | 4.66 | -5.45 |
| P16290                                                 | Phosphoglycerate mutase 2                | <i>Rattus<br/>norvegicus</i>     | 37.94 | 3  | 253 | 28.74 | 8.72 | 32.71 | 27.44 | 3.01 | -5.27 |
| Q2KJJ9                                                 | Fructose-1,6-bisphosphatase<br>isozyme 2 | <i>Bos taurus</i>                | 44.25 | 12 | 339 | 36.74 | 7.66 | 29.12 | 30.36 | 2.01 | 1.23  |
| <hr/> <i>Creatine metabolism</i> <hr/>                 |                                          |                                  |       |    |     |       |      |       |       |      |       |
| Q9XSC6                                                 | Creatine kinase M-type                   | <i>Bos taurus</i>                | 76.64 | 2  | 381 | 42.96 | 7.12 | 33.51 | 27.49 | 2.67 | -6.02 |
| P06732                                                 | Creatine kinase M-type                   | <i>Homo sapiens</i>              | 48.82 | 3  | 381 | 43.07 | 7.25 | 33.19 | 30.04 | 1.99 | -3.15 |
| P00563                                                 | Creatine kinase M-type                   | <i>Oryctolagus<br/>cuniculus</i> | 63.52 | 3  | 381 | 43.09 | 7.12 | 33.16 | 27.08 | 5.20 | -6.08 |
| Q5XLD3                                                 | Creatine kinase M-type                   | <i>Sus scrofa</i>                | 71.13 | 3  | 381 | 43.03 | 7.09 | 31.37 | 23.24 | 2.11 | -8.12 |
| <hr/> <i>Other metabolic process</i> <hr/>             |                                          |                                  |       |    |     |       |      |       |       |      |       |
| P00571                                                 | Adenylate kinase isoenzyme 1             | <i>Sus scrofa</i>                | 52.58 | 2  | 194 | 21.63 | 8.31 | 30.70 | 25.83 | 3.83 | -4.87 |
| P07450                                                 | Carbonic anhydrase 3                     | <i>Equus caballus</i>            | 13.08 | 4  | 260 | 29.49 | 7.84 | 29.37 | 26.44 | 2.01 | -2.93 |
| Q5S1S4                                                 | Carbonic anhydrase 3                     | <i>Sus scrofa</i>                | 20.00 | 2  | 260 | 29.39 | 7.85 | 30.25 | 27.78 | 1.99 | -2.47 |
| Q96DG6                                                 | Carboxymethylenebutenolidase<br>homolog  | <i>Homo sapiens</i>              | 13.06 | 3  | 245 | 28.03 | 7.18 | 28.36 | 26.25 | 1.89 | -2.11 |
| <hr/> <i>Cell growth and development process</i> <hr/> |                                          |                                  |       |    |     |       |      |       |       |      |       |

|                       |                                              |                           |       |   |     |       |      |       |       |      |       |
|-----------------------|----------------------------------------------|---------------------------|-------|---|-----|-------|------|-------|-------|------|-------|
| P19633                | Calsequestrin-1                              | <i>Rattus norvegicus</i>  | 10.59 | 1 | 406 | 46.42 | 4.12 | 26.74 | 23.23 | 3.35 | -3.50 |
| Q13642                | Four and a half LIM domains protein 1        | <i>Homo sapiens</i>       | 30.96 | 3 | 323 | 36.24 | 8.97 | 30.84 | 26.57 | 3.34 | -4.27 |
| Q6ZMU5                | Tripartite motif-containing protein 72       | <i>Homo sapiens</i>       | 11.11 | 1 | 477 | 52.70 | 6.48 | 25.96 | 27.96 | 1.92 | 2.01  |
| P62633                | Cellular nucleic acid-binding protein        | <i>Homo sapiens</i>       | 7.34  | 1 | 177 | 19.45 | 7.71 | 22.56 | 25.60 | 4.25 | 3.04  |
| <i>Other proteins</i> |                                              |                           |       |   |     |       |      |       |       |      |       |
| P02191                | Myoglobin                                    | <i>Cervus elaphus</i>     | 77.27 | 2 | 154 | 17.04 | 7.83 | 34.10 | 30.54 | 2.38 | -3.56 |
| P04250                | Myoglobin                                    | <i>Lagostomus maximus</i> | 9.74  | 1 | 154 | 17.00 | 7.74 | 31.15 | 27.07 | 2.33 | -4.09 |
| P49773                | Histidine triad nucleotide-binding protein 1 | <i>Homo sapiens</i>       | 30.16 | 2 | 126 | 13.79 | 6.95 | 28.24 | 25.91 | 2.51 | -2.33 |
| O54724                | Polymerase I and transcript release factor   | <i>Mus musculus</i>       | 14.80 | 5 | 392 | 43.93 | 5.52 | 25.28 | 27.20 | 1.84 | 1.92  |
| P50397                | Rab GDP dissociation inhibitor beta          | <i>Bos taurus</i>         | 11.69 | 4 | 445 | 50.46 | 6.25 | 23.31 | 25.43 | 1.81 | 2.13  |

338 Control and Low represent 0 and 2 mg lovastatin/kg BW, respectively.

339 <sup>1</sup> # AAs: number of amino acids

340 <sup>2</sup> MW: molecular weight

341 <sup>3</sup> calc. pI: calculated isoelectric point

342 <sup>4</sup> Difference: Difference in the intensity between Control and Low treatment groups.

344 **Table 5. Differentially expressed proteins in *longissimus thoracis et lumborum* muscle of goats supplemented with 4mg**  
 345 **lovastatin/ kg body weight.**

| UniProt<br>Accession           | Description                                 | Species                          | Coverage | # Unique<br>Peptides | # AAs <sup>1</sup> | MW <sup>2</sup><br>[kDa] | calc.<br>pI <sup>3</sup> | Control | Medium | -Log<br>p-value | Difference <sup>4</sup> |
|--------------------------------|---------------------------------------------|----------------------------------|----------|----------------------|--------------------|--------------------------|--------------------------|---------|--------|-----------------|-------------------------|
| <i>Carbohydrate metabolism</i> |                                             |                                  |          |                      |                    |                          |                          |         |        |                 |                         |
| P06733                         | Alpha-enolase                               | <i>Homo sapiens</i>              | 24.65    | 3                    | 434                | 47.14                    | 7.39                     | 30.04   | 23.38  | 5.72            | -6.66                   |
| P00883                         | Fructose-bisphosphate<br>aldolase A         | <i>Oryctolagus<br/>cuniculus</i> | 59.34    | 5                    | 364                | 39.32                    | 8.09                     | 34.17   | 28.21  | 3.79            | -5.97                   |
| P05065                         | Fructose-bisphosphate<br>aldolase A         | <i>Rattus norvegicus</i>         | 50.55    | 1                    | 364                | 39.33                    | 8.09                     | 34.18   | 29.39  | 5.10            | -4.79                   |
| P06744                         | Glucose-6-phosphate<br>isomerase            | <i>Homo sapiens</i>              | 24.19    | 2                    | 558                | 63.11                    | 8.32                     | 30.04   | 24.70  | 3.90            | -5.34                   |
| P04406                         | Glyceraldehyde-3-phosphate<br>dehydrogenase | <i>Homo sapiens</i>              | 29.25    | 1                    | 335                | 36.03                    | 8.46                     | 31.64   | 26.87  | 3.12            | -4.77                   |
| P00355                         | Glyceraldehyde-3-phosphate<br>dehydrogenase | <i>Sus scrofa</i>                | 66.07    | 4                    | 333                | 35.81                    | 8.35                     | 34.22   | 32.02  | 1.86            | -2.21                   |
| Q5E9B1                         | L-lactate dehydrogenase B<br>chain          | <i>Bos taurus</i>                | 32.93    | 9                    | 334                | 36.70                    | 6.44                     | 32.22   | 27.73  | 2.52            | -4.48                   |
| P36871                         | Phosphoglucomutase-1                        | <i>Homo sapiens</i>              | 48.40    | 2                    | 562                | 61.41                    | 6.76                     | 30.09   | 23.07  | 4.95            | -7.02                   |

|        |                                          |                          |       |    |     |       |      |       |       |      |       |
|--------|------------------------------------------|--------------------------|-------|----|-----|-------|------|-------|-------|------|-------|
| P00559 | Phosphoglycerate kinase 1                | <i>Equus caballus</i>    | 48.44 | 6  | 417 | 44.57 | 8.41 | 31.73 | 29.82 | 1.67 | -1.91 |
| P15259 | Phosphoglycerate mutase 2                | <i>Homo sapiens</i>      | 34.78 | 2  | 253 | 28.75 | 8.88 | 32.27 | 26.16 | 5.72 | -6.11 |
| P16290 | Phosphoglycerate mutase 2                | <i>Rattus norvegicus</i> | 37.94 | 3  | 253 | 28.74 | 8.72 | 32.71 | 27.96 | 2.69 | -4.75 |
| Q2KJJ9 | Fructose-1,6-bisphosphatase<br>isozyme 2 | <i>Bos taurus</i>        | 44.25 | 12 | 339 | 36.74 | 7.66 | 29.12 | 30.71 | 2.70 | 1.59  |

---

*Creatine metabolism*

|        |                        |                                  |       |   |     |       |      |       |       |      |       |
|--------|------------------------|----------------------------------|-------|---|-----|-------|------|-------|-------|------|-------|
| Q9XSC6 | Creatine kinase M-type | <i>Bos taurus</i>                | 76.64 | 2 | 381 | 42.96 | 7.12 | 33.51 | 28.29 | 2.93 | -5.23 |
| P06732 | Creatine kinase M-type | <i>Homo sapiens</i>              | 48.82 | 3 | 381 | 43.07 | 7.25 | 33.19 | 28.65 | 4.20 | -4.55 |
| P00563 | Creatine kinase M-type | <i>Oryctolagus<br/>cuniculus</i> | 63.52 | 3 | 381 | 43.09 | 7.12 | 33.16 | 28.82 | 2.94 | -4.34 |
| Q5XLD3 | Creatine kinase M-type | <i>Sus scrofa</i>                | 71.13 | 3 | 381 | 43.03 | 7.09 | 31.37 | 23.85 | 1.98 | -7.52 |

---

*Other metabolic process*

|        |                              |                   |       |   |     |       |      |       |       |      |       |
|--------|------------------------------|-------------------|-------|---|-----|-------|------|-------|-------|------|-------|
| P00571 | Adenylate kinase isoenzyme 1 | <i>Sus scrofa</i> | 52.58 | 2 | 194 | 21.63 | 8.31 | 30.70 | 25.39 | 3.49 | -5.31 |
| Q5S1S4 | Carbonic anhydrase 3         | <i>Sus scrofa</i> | 20.00 | 2 | 260 | 29.39 | 7.85 | 30.25 | 27.78 | 1.73 | -2.47 |
| P48644 | Retinal dehydrogenase 1      | <i>Bos taurus</i> | 16.37 | 6 | 501 | 54.77 | 6.65 | 26.73 | 28.77 | 3.01 | 2.03  |

---

*Cell growth and development process*

|        |                                          |                          |       |   |     |       |      |       |       |      |       |
|--------|------------------------------------------|--------------------------|-------|---|-----|-------|------|-------|-------|------|-------|
| P19633 | Calsequestrin-1                          | <i>Rattus norvegicus</i> | 10.59 | 1 | 406 | 46.42 | 4.12 | 26.74 | 24.11 | 2.56 | -2.63 |
| Q13642 | Four and a half LIM domains<br>protein 1 | <i>Homo sapiens</i>      | 30.96 | 3 | 323 | 36.24 | 8.97 | 30.84 | 26.21 | 3.97 | -4.63 |
| P62633 | Cellular nucleic acid-binding            | <i>Homo sapiens</i>      | 7.34  | 1 | 177 | 19.45 | 7.71 | 22.56 | 25.47 | 3.99 | 2.91  |

| protein                           |                                               |                     |       |   |      |       |      |       |       |      |       |
|-----------------------------------|-----------------------------------------------|---------------------|-------|---|------|-------|------|-------|-------|------|-------|
| Q2UVX4                            | Complement C3                                 | <i>Bos taurus</i>   | 4.21  | 4 | 1661 | 187.1 | 6.84 | 24.33 | 27.35 | 1.68 | 3.02  |
| 4                                 |                                               |                     |       |   |      |       |      |       |       |      |       |
| <hr/> <i>Other proteins</i> <hr/> |                                               |                     |       |   |      |       |      |       |       |      |       |
| P49773                            | Histidine triad nucleotide-binding protein 1  | <i>Homo sapiens</i> | 30.16 | 2 | 126  | 13.79 | 6.95 | 28.24 | 26.18 | 2.04 | -2.06 |
| Q2KHU5                            | O-acetyl-ADP-ribose deacetylase               | <i>Bos taurus</i>   | 27.38 | 6 | 325  | 35.55 | 9.32 | 28.98 | 27.17 | 2.49 | -1.82 |
| Q09666                            | Neuroblast differentiation-associated protein | <i>Homo sapiens</i> | 4.21  | 5 | 5890 | 628.7 | 6.15 | 24.64 | 26.70 | 1.78 | 2.05  |
| 0                                 |                                               |                     |       |   |      |       |      |       |       |      |       |

346 Control and Medium represent 0 and 4 mg lovastatin/kg BW, respectively.

347 <sup>1</sup> # AAs: number of amino acids

348 <sup>2</sup> MW: molecular weight

349 <sup>3</sup> calc. pI: calculated isoelectric point

350 <sup>4</sup> Difference: Difference in the intensity between Control and Medium treatment groups.

352 **Table 6. Differentially expressed proteins in *longissimus thoracis et lumborum* muscle of goats supplemented with 6mg**  
 353 **lovastatin/ kg body weight.**

| UniProt<br>Accession           | Description                                                    | Species                          | Coverage | # Unique<br>Peptides | # AAs <sup>1</sup> | MW <sup>2</sup><br>[kDa] | calc.<br>pI <sup>3</sup> | Control | High  | -Log p-<br>value | Difference <sup>4</sup> |
|--------------------------------|----------------------------------------------------------------|----------------------------------|----------|----------------------|--------------------|--------------------------|--------------------------|---------|-------|------------------|-------------------------|
| <i>Carbohydrate metabolism</i> |                                                                |                                  |          |                      |                    |                          |                          |         |       |                  |                         |
| P00883                         | Fructose-bisphosphate aldolase<br>A                            | <i>Oryctolagus<br/>cuniculus</i> | 59.34    | 5                    | 364                | 39.32                    | 8.09                     | 34.17   | 31.71 | 1.74             | -2.46                   |
| P05065                         | Fructose-bisphosphate aldolase<br>A                            | <i>Rattus<br/>norvegicus</i>     | 50.55    | 1                    | 364                | 39.33                    | 8.09                     | 34.18   | 31.90 | 1.50             | -2.28                   |
| P08059                         | Glucose-6-phosphate isomerase                                  | <i>Sus scrofa</i>                | 28.49    | 2                    | 558                | 63.09                    | 7.99                     | 30.02   | 26.84 | 1.53             | -3.18                   |
| P13707                         | Glycerol-3-phosphate<br>dehydrogenase [NAD(+)],<br>cytoplasmic | <i>Mus musculus</i>              | 22.92    | 6                    | 349                | 37.55                    | 7.17                     | 31.84   | 28.48 | 3.05             | -3.36                   |
| A8BQB4                         | Glycogen debranching enzyme                                    | <i>Equus<br/>caballus</i>        | 14.94    | 7                    | 1533               | 174.5<br>6               | 6.70                     | 28.77   | 25.02 | 1.56             | -3.75                   |
| P19858                         | L-lactate dehydrogenase A<br>chain                             | <i>Bos taurus</i>                | 73.19    | 3                    | 332                | 36.57                    | 8.00                     | 33.89   | 28.79 | 3.57             | -5.10                   |
| Q5E9B1                         | L-lactate dehydrogenase B<br>chain                             | <i>Bos taurus</i>                | 32.93    | 9                    | 334                | 36.70                    | 6.44                     | 32.22   | 27.79 | 2.18             | -4.43                   |

|                                            |                                         |                                  |       |    |     |       |      |       |       |      |       |
|--------------------------------------------|-----------------------------------------|----------------------------------|-------|----|-----|-------|------|-------|-------|------|-------|
| Q08DP0                                     | Phosphoglucomutase-1                    | <i>Bos taurus</i>                | 67.44 | 12 | 562 | 61.55 | 6.81 | 31.52 | 29.40 | 2.02 | -2.12 |
| P36871                                     | Phosphoglucomutase-1                    | <i>Homo sapiens</i>              | 48.40 | 2  | 562 | 61.41 | 6.76 | 30.09 | 24.80 | 2.74 | -5.29 |
| P00559                                     | Phosphoglycerate kinase 1               | <i>Equus<br/>caballus</i>        | 48.44 | 6  | 417 | 44.57 | 8.41 | 31.73 | 28.20 | 2.32 | -3.53 |
| Q7SIB7                                     | Phosphoglycerate kinase 1               | <i>Sus scrofa</i>                | 48.68 | 4  | 417 | 44.53 | 7.90 | 31.74 | 28.13 | 2.29 | -3.60 |
| P15259                                     | Phosphoglycerate mutase 2               | <i>Homo sapiens</i>              | 34.78 | 2  | 253 | 28.75 | 8.88 | 32.27 | 27.74 | 1.48 | -4.53 |
| P60174                                     | Triosephosphate isomerase               | <i>Homo sapiens</i>              | 53.15 | 12 | 286 | 30.77 | 5.92 | 32.47 | 30.44 | 1.75 | -2.03 |
| K0J107                                     | Malate dehydrogenase,<br>mitochondrial  | <i>Felis catus</i>               | 34.32 | 8  | 338 | 35.49 | 8.68 | 27.48 | 25.16 | 1.48 | -2.32 |
| Q99798                                     | Aconitate hydratase,<br>mitochondrial   | <i>Homo sapiens</i>              | 10.64 | 5  | 780 | 85.37 | 7.61 | 26.52 | 23.92 | 1.48 | -2.60 |
| <hr/> <i>Creatine metabolism</i> <hr/>     |                                         |                                  |       |    |     |       |      |       |       |      |       |
| Q9XSC6                                     | Creatine kinase M-type                  | <i>Bos taurus</i>                | 76.64 | 2  | 381 | 42.96 | 7.12 | 33.51 | 31.90 | 1.50 | -1.62 |
| P06732                                     | Creatine kinase M-type                  | <i>Homo sapiens</i>              | 48.82 | 3  | 381 | 43.07 | 7.25 | 33.19 | 30.69 | 2.02 | -2.50 |
| P00563                                     | Creatine kinase M-type                  | <i>Oryctolagus<br/>cuniculus</i> | 63.52 | 3  | 381 | 43.09 | 7.12 | 33.16 | 30.81 | 1.87 | -2.35 |
| <hr/> <i>Other metabolic process</i> <hr/> |                                         |                                  |       |    |     |       |      |       |       |      |       |
| Q96DG6                                     | Carboxymethylenebutenolidase<br>homolog | <i>Homo sapiens</i>              | 13.06 | 3  | 245 | 28.03 | 7.18 | 28.36 | 23.90 | 3.60 | -4.47 |
| A4Z6H0                                     | Adenylosuccinate synthetase             | <i>Sus scrofa</i>                | 17.07 | 1  | 457 | 50.07 | 8.51 | 26.37 | 22.85 | 1.79 | -3.53 |



isozyme 1

---

*Other proteins*

|        |                                |                     |       |    |     |       |      |       |       |      |       |
|--------|--------------------------------|---------------------|-------|----|-----|-------|------|-------|-------|------|-------|
| Q1KZF3 | Beta A globin chain            | <i>Capra hircus</i> | 82.76 | 13 | 145 | 16.01 | 7.30 | 30.85 | 26.54 | 3.04 | -4.30 |
| I1X3V1 | Galectin                       | <i>Capra hircus</i> | 26.47 | 3  | 136 | 14.81 | 5.10 | 26.96 | 24.71 | 2.59 | -2.25 |
| Q99497 | Protein DJ-1                   | <i>Homo sapiens</i> | 43.39 | 7  | 189 | 19.88 | 6.79 | 29.87 | 27.44 | 1.71 | -2.44 |
| P50397 | Rab GDP dissociation inhibitor | <i>Bos taurus</i>   | 11.69 | 4  | 445 | 50.46 | 6.25 | 23.31 | 26.66 | 2.68 | 3.35  |

beta

---

354 Control and High represent 0 and 6 mg lovastatin/kg BW, respectively.

355 <sup>1</sup> # AAs: number of amino acids

356 <sup>2</sup> MW: molecular weight

357 <sup>3</sup> calc. pI: calculated isoelectric point

358 <sup>4</sup> Difference: Difference in the intensity between Control and High treatment groups.

359

360

361           The differentially expressed proteins were grouped on the basis of their  
362 functional role in the following categories: carbohydrate metabolism, creatine  
363 metabolism, other metabolic process, cell growth and development process and  
364 others. Most of the proteins affected were involved in carbohydrate metabolism,  
365 in which fructose-bisphosphate aldolase A, glucose-6-phosphate isomerase, L-  
366 lactate dehydrogenase B chain, phosphoglucomutase-1, phosphoglycerate  
367 kinase 1, and phosphoglycerate mutase 2 were down-regulated in all lovastatin  
368 treatment groups when compared to the Control group. The muscle of the Low  
369 and Medium treatment groups showed a down-regulation in the alpha-enolase  
370 and glyceraldehyde-3-phosphate dehydrogenase when compared to the  
371 Control group. Fructose-bisphosphate aldolase B was down-regulated in the  
372 Low treatment group only, while glycerol-3-phosphate dehydrogenase [NAD<sup>+</sup>],  
373 glycogen debranching enzyme, L-lactate dehydrogenase A, malate  
374 dehydrogenase, aconitate hydratase and triosephosphate isomerase were  
375 down-regulated in the High treatment group only. Simultaneously, fructose-1,6-  
376 bisphosphatase isozyme 2 was up-regulated in the Low and Medium treatment  
377 groups when compared to the Control group.

378

379           The present findings also observed the down-regulation of creatine  
380 kinase M type in all of the lovastatin treatment groups when compared to the  
381 Control group. In addition, there were a number of proteins involved in the other  
382 metabolic processes that were identified to be differentially expressed in the  
383 lovastatin treatment groups. For example, adenylate kinase isoenzyme 1 and  
384 carbonic anhydrase 3 were down-regulated in the Low and Medium treatment  
385 groups, while carboxymethylenebutenolidase homolog was found to be down-

386 regulated in the Low and High treatment groups. Adenylosuccinate synthetase  
387 isozyme 1 was down-regulated in the High treatment group only when  
388 compared to the Control group. Retinal dehydrogenase 1 was found to be up-  
389 regulated in the Medium treatment group when compared to Control group.

390

391 There were also proteins involved in cell growth and development  
392 processes found to be differentially expressed in the present study. For instance,  
393 calsequestrin-1 and four and a half LIM domains protein 1 (FHL1) were down-  
394 regulated, while cellular nucleic acid-binding protein was up-regulated in the  
395 Low and Medium treatment groups when compared to the Control group.  
396 Tripartite motif-containing protein 72 was found to be up-regulated in the Low  
397 treatment group as compared to the Control group. Complement C3 was up-  
398 regulated in the Medium treatment group as compared to the Control group.

399

400 The expressions of a number of proteins involved in other processes  
401 were also identified to be regulated in the present study. Myoglobin and  
402 histidine triad nucleotide-binding protein 1 were down-regulated while  
403 polymerase I and transcript factor, and Rab GDP dissociation inhibitor beta  
404 were up-regulated in the Low treatment group when compared to the Control  
405 group. In addition, the Medium treatment group showed that histidine triad  
406 nucleotide-binding protein 1 and O-acetyl-ADP-ribose deacetylase were down-  
407 regulated, while neuroblast differentiation-associated protein was up-regulated.  
408 In the High treatment group, beta A globin chain, galectin and protein DJ-1 were  
409 down-regulated while Rab GDP dissociation inhibitor beta was up-regulated.

410

411 The differentially expressed proteins were subjected to IPA® analysis.  
412 These proteins were identified to be associated with several possible canonical  
413 pathways, which including glycolysis I, gluconeogenesis I, glucose and glucose-  
414 1-phosphate degradation, creatine-phosphate biosynthesis and pyruvate  
415 fermentation to lactate. Generally, these proteins were involved in a network of  
416 carbohydrate metabolism, energy production, and skeletal and muscular system  
417 development and function.

418

## 419 **Discussion**

420 Statins are the most widely used lipid lowering agents which inhibit  
421 HMG-CoA reductase in the cholesterol biosynthesis pathway. Nevertheless, the  
422 use of statins is reported to have adverse effects such as muscular pain,  
423 cramps and/or stiffness on skeletal muscles in humans [24]. We had previously  
424 reported that lovastatin effectively decreased methane production in goats [18].  
425 Given the potential for myopathies at higher than recommended therapeutic  
426 doses the effects of naturally produced statins on the skeletal muscles of  
427 ruminants was a primary interest of ours. Hence, the present study examined  
428 the effects of naturally produced lovastatin on the histology and proteome  
429 profile of the representative goat skeletal muscle longissimus thoracis et  
430 lumborum.

431

## 432 **Histology**

433 Histological examination in the present study showed that  
434 supplementation of lovastatin had light to moderate adverse effects on the

435 longissimus thoracis et lumborum muscle. The dose levels of the lovastatin  
436 supplementation are positively correlated to the extent of cellular damage on  
437 the skeletal muscle as reported previously [25]. Supplementation of 2mg  
438 lovastatin/kg BW induced the a low but noticeable degeneration of the muscle  
439 fiber in the goats. At higher dosages (4 and 6 mg/kg) naturally produced statin  
440 resulted in the higher degree of necrosis and degeneration, as well as larger  
441 interstitial space and vacuolization in the skeletal muscle.

442

### 443 **Expression of myosin heavy chain and actin**

444         Statin supplementation is reported to be involved in a large augmentation  
445 of reactive oxygen species production in skeletal muscle which induce  
446 mitochondrial impairments, reduce biogenesis mechanisms and result in  
447 muscular pain or myopathy [26]. Production of reactive oxygen species in the  
448 skeletal muscle may oxidize and degrade the myofibrillar proteins. Myosin  
449 heavy chain is the protein most sensitive to oxidation among the myofibrillar  
450 proteins [27]. Previous studies observed a decrease in the concentration of  
451 myosin heavy chain following the exposure to oxidants [20, 28]. High oxidative  
452 conditions cause cross-linking, polymerization and aggregate formation in  
453 myosin heavy chain through the formation of disulfide bonds, bityrosine and  
454 carbonyl derivatives [20]. In the present study, western blot analysis showed a  
455 slight degradation of myosin heavy chain only in the High treatment group.  
456 Although histological examination found that there was cellular damage in the  
457 Medium treatment group, there was no degradation on the myosin heavy chain  
458 detected. On the other hand, actin has been reported to be relatively stable  
459 under oxidative conditions [20, 28]. This may be attributable to the

460 inaccessibility of oxidation sites, in which myofibrillar suspensions may be  
461 masked by the interaction of actin and myosin chains [28]. The present study  
462 also demonstrated that lovastatin supplementation had no effect on the actin of  
463 skeletal muscle in goat.

464

## 465 **Differentially expressed proteins**

466 The present proteomics analysis demonstrated that supplementation of  
467 lovastatin induced modifications on the expression of a number of proteins,  
468 regardless the concentration of lovastatin. This data suggests that lovastatin  
469 had an effect on a wide range of biological functions in the muscle. Lovastatin  
470 supplementation had impaired the energy production system in the skeletal  
471 muscle, particularly in the metabolism of carbohydrate and creatine. Similar  
472 observations have been reported on the extensor digitorum longus muscle of  
473 rats treated for 2-months of 10mg atorvastatin/kg BW and 20mg fluvastatin/kg  
474 BW [29]. The impairment in the energy production system could play a major  
475 role in the development of muscle damage, which is consistent with the adverse  
476 effects observed on the longissimus thoracis et lumborum muscle through  
477 histological examination.

478

## 479 **Carbohydrate metabolism**

480 The present study showed that lovastatin supplementation down-  
481 regulated proteins involving in glycolysis, gluconeogenesis and fructose  
482 metabolism. For examples, alpha-enolase, fructose-bisphosphate aldolase A,  
483 fructose-bisphosphate aldolase B, glucose-6-phosphate isomerase,  
484 glyceraldehyde-3-phosphate dehydrogenase, phosphoglycerate kinase 1,

485 phosphoglycerate mutase 2 and triosephosphate isomerase are glycolytic  
486 enzymes which were down-regulated following lovastatin supplementation. In  
487 addition, phosphoglucomutase-1 that catalyzing the bi-directional inter-  
488 conversion of glucose-1-phosphate and glucose-6-phosphate, was also down-  
489 regulated following lovastatin supplementation. Glucose-1-phosphate is a  
490 substrate for synthesis of UDP-glucose used to synthesis a variety of cellular  
491 constituents, while glucose-6-phosphate is the first intermediate in glycolysis.

492

493 Glycolysis is an oxygen independent pathway that converts 6-carbon  
494 glucose into pyruvate. Through this metabolic process, high energy adenosine  
495 triphosphate (ATP) molecules and reduced nicotinamide adenine dinucleotide  
496 (NADH) are generated. Similar observations of down-regulation of glycolytic  
497 enzymes in the skeletal muscle have also reported previously in rat and the  
498 down-regulation of glycolytic enzymes is a symptom of energy production failure,  
499 and can contribute to muscle damage [29]. In humans, hereditary muscle  
500 glycogenoses are characterized by defective glycolytic enzymes and leads to  
501 different degree of myopathy [30].

502

503 Interestingly, glycogen debranching enzyme, mitochondrial malate  
504 dehydrogenase and mitochondrial aconitase hydratase were identified to be  
505 down-regulated in the High treatment group only when compared to the Control  
506 group. Glycogen debranching enzyme is an important regulatory enzyme in  
507 cellular glucose utilization and energy homeostasis. This bi-functional enzyme  
508 exhibiting both of oligotransferase (oligo-1,4 to 1,4-glucontransferase, EC  
509 2.4.1.25) and glucosidase (amylo-1,6-glucosidase, EC 3.2.1.33) activities in a

510 single polypeptide chain. Along with phosphorylase, this enzyme catalyzes the  
511 complete degradation of glycogen and the release of glucose-1-phosphate and  
512 glucose [31]. Down-regulation of this enzyme indicates the reduction of glucose  
513 degraded from glycogen, and would subsequently affect the rate of glycolysis in  
514 the skeletal muscle.

515

516 Both, mitochondrial malate dehydrogenase and aconitate hydratase are  
517 integral components in the tricarboxylic acid (TCA) cycle which playing crucial  
518 roles in energy production and biosynthesis. Malate dehydrogenase reversibly  
519 catalyzes the oxidation of malate to oxaloacetate, which is crucial in  
520 regenerating oxaloacetate that can be utilized in the TCA cycle and amino acid  
521 production [32]. Meanwhile, aconitate hydratase catalyzes the inter-conversion  
522 of citrate, isocitrate and cis-aconitate in the TCA cycle [33]. Mitochondrial  
523 aconitate hydratase is also involved in iron metabolism and is very sensitive to  
524 reactive oxygen species [34]. Large augmentation of reactive oxygen species is  
525 produced in the skeletal muscle and is associated with the induction of  
526 mitochondrial impairment [26]. The present findings indicate that a high level of  
527 lovastatin supplementation (6mg/kg BW) results in the impairment of  
528 mitochondrial function, which is in agreement with Päävä et al. [35] reporting  
529 reduction of mitochondria volume in skeletal muscle following aggressive statin  
530 treatment.

531

532 Meanwhile, fructose-1,6-bisphosphate isozyme 2 was up-regulated in the  
533 Low and Medium treatment groups. This enzyme catalyzes the hydrolysis of  
534 fructose-1,6-bisphosphate to fructose-6-phosphate in the gluconeogenesis [36].



535 In glycolysis, fructose-6-phosphate is converted to fructose-1,6-bisphosphate by  
536 phosphofructokinase. This step is one of the rate-limiting steps in the glycolytic  
537 pathway. Up-regulation of fructose-1,6-bisphosphate isozyme 2 and the  
538 suppression of glycolysis prevent the breaking down of glucose, and  
539 subsequently the reduction in ATP production.

540

## 541 **Creatine metabolism**

542 Generally, statin supplementation is associated with the higher  
543 concentration of creatine kinase in the blood plasma. The present study  
544 observed a down-regulation of creatine kinase following the lovastatin  
545 supplementation. Similarly, decrease of creatine kinase in the skeletal muscle of  
546 goat was also observed in rat [29]. Creatine kinase is an enzyme catalyzes the  
547 conversion of creatine to phosphocreatine by utilizing ATP. This enzyme also  
548 catalyzes the reverse reaction to produce phosphocreatine and ATP. In tissues  
549 utilizing a large amount of ATP such as skeletal muscle, creatine kinase  
550 /phosphocreatine system plays a complex and multi-faceted role in regulating  
551 cellular energy homeostasis [37]. The ATP regeneration capacity of creatine  
552 kinase is very high and considerably exceeds both cellular utilization and  
553 replenishment through glycolysis and oxidative phosphorylation [37].  
554 Interestingly, previous study showed that the transgenic mice lacking either the  
555 cytoplasmic or mitochondrial creatine kinase may develop muscle atrophy [38].  
556 Together with proteins involved in carbohydrate metabolism, down-regulation of  
557 creatine kinase indicated an impairment to the energy production system, which  
558 may develop statin myopathy.

559

## 560 **Other metabolic process**

561 Down-regulation of adenylate kinase isozyme 1, adenylosuccinate  
562 synthetase isozyme 1 and carbonic anhydrase 3 may impair the energy  
563 production in the skeletal muscle. Adenylate kinase isozyme 1 and  
564 adenylosuccinate synthetase isozyme 1 play an important role in cellular  
565 energy homeostasis, and more specifically in adenine nucleotide metabolism.  
566 Adenylate kinase isozyme 1 catalyzes the reversible transfer of phosphate  
567 between ATP and adenosine monophosphate (AMP), while adenylosuccinate  
568 synthetase isozyme 1 interconverts inosine monophosphate (IMP) and AMP to  
569 regulate nucleotide levels in the tissue, and which contributes to the regulation  
570 of glycolysis. Meanwhile, the lack of carbonic anhydrase 3 is suggested to  
571 impair mitochondrial ATP synthesis in the gastrocnemius muscle of rat [39].  
572 Furthermore, carbonic anhydrase 3 is also shown to provide protection to the  
573 cells against free radicals [40].

574

575 Retinal dehydrogenase 1, glycerol-3-phosphate dehydrogenase [NAD<sup>+</sup>],  
576 L-lactate dehydrogenase A chain and L-lactate dehydrogenase B chain are  
577 involved in redox cofactor metabolism which plays a central role in meeting  
578 cellular redox requirements of proliferating mammalian cells. Retinal  
579 dehydrogenase 1 converts retinaldehyde to retinoic acid, which directly  
580 catalyzes the regeneration of NADH. Glycerol-3-phosphate dehydrogenase  
581 catalyzes the reversible conversion of dihydroxyacetone phosphate to glycerol-  
582 3-phosphate, which involves the redox reaction of NADH and NAD<sup>+</sup>. Meanwhile,  
583 lactate dehydrogenase catalyzes the conversion of pyruvate into lactate.  
584 Usually, a large amount of lactate is generated in proliferating cells to allow high

585 glycolytic flux to support the generation of ATP and biosynthetic precursors [41].  
586 At the same time, generation of lactate also involves the conversion of NADH to  
587 NAD<sup>+</sup> by lactate dehydrogenase. NAD<sup>+</sup> is crucial as it is directly used to oxidize  
588 precursors of some nucleotides and amino acids, and also many intermediates  
589 of NAD<sup>+</sup>-dependent pathway are important precursors for biosynthesis [42].  
590 Reduction in these proteins may affect the NADP dependent pathways, then  
591 blocking the ATP production pathways.

592

### 593 **Cell growth and development process**

594 Reduction in the expression of calsequestrin and FHL1, that are involved  
595 in muscle development, was associated with the muscle damage. Calsequestrin  
596 is a Ca<sup>2+</sup>-binding protein, which has been showed to be decreased in  
597 dystrophic mouse skeletal muscle [43], while mutation in FHL1 gene is  
598 associated with myopathy [44]. FHL1 is a multifunctional protein likely to be  
599 involved in ion channel binding and muscle development. Furthermore,  
600 transport proteins such as beta A globin chain, myoglobin and polymerase I and  
601 transcript release factor were also down-regulated following lovastatin  
602 supplementation. Polymerase I and transcript release factor is a protein  
603 associated with processes of vesicular transport and cholesterol homeostasis  
604 [45].

605

606 The present findings also identified proteins involved in the muscle tissue  
607 development (such as complement C3, tripartite motif-containing proteins 72,  
608 and cellular nucleic acid binding protein) which were up-regulated following  
609 lovastatin supplementation. Complement C3 is shown to be activated in skeletal

610 muscle injury and plays a key role in the regeneration of muscle tissue [46, 47].  
611 Tripartite motif-containing proteins are expressed in the skeletal muscle to  
612 regulate muscle coordination, atrophy and repair. This protein plays an vital role  
613 as a negative regulator of IGF-induced muscle differentiation [48]. Meanwhile,  
614 cellular nucleic acid binding protein has been reported recently that its  
615 modifications which are indicated to play a role in myotonic dystrophy type 2  
616 disease might result in muscle atrophy through affecting myofiber membrane  
617 function [49]. Together with Rab GDP dissociation inhibitor beta which involved  
618 in the regulation of vesicle-mediated cellular transport [50], up-regulation of  
619 these proteins in the present study indicated that the mechanism associated  
620 with tissue regeneration or repair was activated in the muscle tissue.

621

## 622 **Other proteins**

623 In addition to the energy production system, proteins involved in other  
624 cellular processes were also affected by lovastatin. Proteins such as galectins,  
625 histidine triad nucleotide-binding protein 1 and Protein DJ-1, which are in  
626 involved in the regulation of the apoptotic pathway, were also down-regulated  
627 following lovastatin supplementation. Galectins have a diverse range of  
628 biological functions including regulation of pre-mRNA splicing, cell adhesion,  
629 cell growth, differentiation, apoptosis and cell cycle [51], while protein DJ-1  
630 plays an important role in cell protection against oxidative stress and cell death  
631 [52].

632

633 Taken together, the present study has shown that lovastatin  
634 supplementation down-regulates proteins involved in the energy production

635 system (particularly the glycolytic pathway and creatine metabolism), regardless  
636 of the concentration of lovastatin. Supplementation with a high concentration of  
637 lovastatin (6mg/ kg BW) could further impair the TCA cycle. Moreover,  
638 supplementation of lovastatin also activates tissue regeneration or repair in the  
639 muscle tissue. Furthermore, changes in the expression of proteins involved in  
640 apoptosis and oxidative damage suggests an accentuated sensitivity of statin-  
641 treated muscle to oxidative stress. Oxidative stress can promote increased  
642 proteolysis and depress protein synthesis, and trigger many conditions  
643 associated with muscle wasting [53]. Such perturbation in energy metabolism  
644 and ATP synthesis may have profound effects on protein synthesis and  
645 contribute to metabolic stress, which could play a major role in the development  
646 of myopathy.

647

## 648 **Conclusions**

649 Histology scores indicated increasing muscle damage to the longissimus  
650 thoracis et lumborum muscle of goats supplemented with increasing dosages,  
651 particularly at 6mg/kg BW, of naturally produced lovastatin. In addition, western  
652 blot analysis indicated that the immunoreactivity of myosin heavy chain was  
653 only degraded in the muscle of goats supplemented with 6mg lovastatin/kg BW.  
654 Proteomics analysis revealed that lovastatin supplementation induced complex  
655 modifications to the carbohydrate metabolism, energy production, and skeletal  
656 and muscular system development of skeletal muscle of goats which may have  
657 contributed to the observed skeletal muscle damage. Putting together results of  
658 the above three analyses, it is clear that supplementation of naturally-produced

659 lovastatin at 6 mg/kg BW is too high, which can adversely affecting health and

660 wellbeing of the animals.

661

## 663 Acknowledgements

664 This study was funded by the New Zealand Government to support  
665 the objectives of Livestock Research Group of the Global Research Alliance on  
666 Agricultural Greenhouse Gases and Universiti Putra Malaysia. The authors  
667 acknowledged the contribution of Proteomics Core Facility, Malaysia Genome  
668 Institute, National Institutes of Biotechnology Malaysia (NIBM).

669

## 670 References

- 671 1. FAO (Food and Agriculture Organization of the United Nations).  
672 Livestock a major threat to the environment: remedies urgently needed.  
673 2006. Available from:  
674 [www.fao.org/newsroom/en/news/2006/1000448/index.html](http://www.fao.org/newsroom/en/news/2006/1000448/index.html)
- 675 2. Hristov AN, Oh J, Firkins JL, Dijkstra J, Kebreab E, Waghorn G, et al.  
676 Special topics: Mitigation of methane and nitrous oxide emissions from  
677 animal operations: I. A review of enteric methane mitigation options. J  
678 Anim Sci. 2013; 91:5045-5069.
- 679 3. Mcallister TA, Newbold CJ. Redirecting rumen fermentation to reduce  
680 methanogenesis. Aust J Exp Agric. 2008; 48:7-13.
- 681 4. Johnson DE, Hill TM, Ward GM, Johnson KA, Branine MR, Carmean  
682 BR, et al. Ruminants and other animals. In: Khalil MAK, editor.  
683 Atmospheric methane: sources, sinks, and role in global change.  
684 NATO ASI Series (Series I: Global Environmental Change); 1993. pp.  
685 199-229.

- 686 5. Elghandour MMY, Vázquez JC, Salem AZM, Kholif AE, Cipriano MM,  
687 Camacho LM, et al. *In vitro* gas and methane production of two mixed  
688 rations influenced by three different cultures of *Saccharomyces*  
689 *cerevisiae*. J Appl Anim Res. 2017; 45:389-395.
- 690 6. Salem AZM, Kholif AE, Elghandour MMY, Buendía G, Mariezcurrena MD,  
691 Hernandez SR, et al. Influence of oral administration of *Salix babylonica*  
692 extract on milk production and composition in dairy cows. Ital J Anim Sci.  
693 2014; 13(1):10-14.
- 694 7. Wildenauer FX, Blotevogel KH, Winter J. Effect of monensin and 2-  
695 bromoethanesulfonic acid on fatty acid metabolism and methane  
696 production from cattle manure. Appl Microbiol and Biotechnol. 1984;  
697 19(2):125–130.
- 698 8. Martin SA. Manipulation of ruminal fermentation with organic acids: a  
699 review. J Anim Sci. 1998; 76(12):3123-3132.
- 700 9. Dohme F, Machmüller A, Wasserfallen A, Kreuzer M. Ruminal  
701 methanogenesis as influenced by individual fatty acids supplemented to  
702 complete ruminant diets. Lett Appl Microbiol. 2001; 32(1):47-51.
- 703 10. Lee SY, Yang SH, Lee WS, Kim HS, Shin DE, Ha JK. Effect of 2-  
704 bromoethanesulfonic acid on *in vitro* fermentation characteristics and  
705 methanogen population. Asian- Australas J Anim Sci. 2009; 22(1):42-48.
- 706 11. Williams YJ, Popovski S, Rea SM, Skillman LC, Toovey AF, Northwood  
707 KS, et al. A vaccine against rumen methanogens can alter the  
708 composition of archaeal populations. Appl Environ Microbiol. 2009;  
709 75(7):1860-1866.



- 710 12. Mohammed N, Ajisaka N, Lila ZA, Hara K, Mikuni K, Hara K, et al. Effect  
711 of Japanese horseradish oil on methane production and ruminal  
712 fermentation in vitro and in steers. J Anim Sci. 2004; 82(6):1839-1846.
- 713 13. Jahromi MF, Liang JB, Ho YW, Mohamad R, Goh YM, Shokryazdan P.  
714 Lovastatin production by *Aspergillus terreus* using agro-biomass as  
715 substrate in solid state fermentation. J Biomed Biotechnol. 2012.  
716 doi:10.1155/2012/196264.
- 717 14. Alberts W, Chen J, Kuron G. Mevinolin: a highly potent competitive  
718 inhibitor of hydroxymethylglutaryl- coenzyme A reductase and a  
719 cholesterol-lowering agent. Proc Natl Acad Sci U S A. 1980; 77(7):3957-  
720 3961.
- 721 15. Wolin MJ, Miller TL. Control of rumen methanogenesis by inhibiting the  
722 growth and activity of methanogens with hydroxymethylglutaryl-CoA  
723 inhibitors. Int Congr Ser. 2006; 1293:131-137.
- 724 16. Azlan PM, Jahromi MF, Ariff MO, Ebrahimi M, Candyrine SCL, Liang JB.  
725 *Aspergillus terreus* treated rice straw suppresses methane production  
726 and enhances feed digestibility in goats. Trop Anim Health Prod. 2018;  
727 50(3)565-571.
- 728 17. Ramírez-Restrepo CA, O'Neill CJ, López-Villalobos N, Padmanabha J,  
729 McSweeney C. Tropical cattle methane emissions: the role of natural  
730 statins supplementation. Anim Prod Sci. 2014; 54:1294-1299.
- 731 18. Candyrine SCL, Mahadzir MF, Garba S, Jahromi MF, Ebrahimi M, A.A  
732 Samsudin, et al. Effects of naturally-produced lovastatin on feed  
733 digestibility, rumen fermentation, microbiota and methane emissions in

- 734 goats over a 12-week treatment period. PLOS ONE. 2018; 13(7):  
735 e0199840. doi.org/10.1371/journal.pone.0199840.
- 736 19. Gall A, Treuting P, Elkon KB, Loo Y-M, Gale MJr, Barber GN, et al.  
737 Autoimmunity initiates in non-hematopoietic cells and progresses via  
738 lymphocytes in an interferon-dependent autoimmune disease. Immunity.  
739 2012; 36(1):120-131.
- 740 20. Morzel M, Gatellier P, Sayd T, Renerre M, Laville E. Chemical oxidation  
741 decreases proteolytic susceptibility of skeletal muscle myofibrillar  
742 proteins. Meat Sci. 2006; 73(3):536-543.
- 743 21. Laemmli UK. Cleavage of structural proteins during the assembly of the  
744 head of bacteriophage T4. Nature. 1970; 227(5259):680-685.
- 745 22. Bradford MM. A rapid and sensitive method for the quantitation of  
746 microgram quantities of protein utilizing the principle of protein-dye  
747 binding. Analyt Biochem. 1972; 72:248-254.
- 748 23. Huang DW, Lempicki RA, Sherman BT. Systematic and integrative  
749 analysis of large gene lists using DAVID bioinformatics resources. Nat  
750 Protoc. 2009; 4(1):44-57.
- 751 24. Bruckert E, Hayem G, Dejager S, Yau C, Begaud B. Mild to moderate  
752 muscular symptoms with high-dosage statin therapy in hyperlipidemic  
753 patients - The PRIMO study. Cardiovasc Drugs and Ther. 2005; 19:403-  
754 414.
- 755 25. Norata GD, Tibolla G, Catapano AL. Statins and skeletal muscles  
756 toxicity: from clinical trials to everyday. Pharmacol Res. 2014; 88:107-  
757 113.

- 758 26. Bouitbir J, Charles A, Echaniz-laguna A, Kindo M, Daussin F, Auwerx J,  
759 et al. Opposite effects of statins on mitochondria of cardiac and skeletal  
760 muscles : a 'mitohormesis' mechanism involving reactive oxygen species  
761 and PGC-1. *Eur Heart J.* 2012; 33:1397-1407.
- 762 27. Sun W, Cui C, Zhao M, Zhao Q, Yang B. Effects of composition and  
763 oxidation of proteins on their solubility, aggregation and proteolytic  
764 susceptibility during processing of Cantonese sausage. *Food Chem.*  
765 2011; 124(1):336-341.
- 766 28. Xue M, Huang F, Huang M, Zhou G. Influence of oxidation on myofibrillar  
767 proteins degradation from bovine via  $\mu$ -calpain. *Food Chem.* 2012;  
768 134(1):106-112.
- 769 29. Camerino GM, Pellegrino MA, Brocca L, Digennaro C, Camerino DC,  
770 Pierno S, et al. Statin or fibrate chronic treatment modifies the proteomic  
771 profile of rat skeletal muscle. *Biochem Pharmacol.* 2011; 81(8):1054-  
772 1064.
- 773 30. DiMauro S, Lamperti C. Muscle glycogenoses. *Muscle Nerve.* 2001;  
774 24(8):984-999.
- 775 31. Nakayama A, Yamamoto K, Tabata S. Identification of the catalytic  
776 residues of bifunctional glycogen debranching enzyme. *J Biol Chem.*  
777 2001; 276(31):28824-28828.
- 778 32. Gamberi T, Fiaschi T, Valocchia E, Modesti A, Mantuano P, Rolland J, et  
779 al. Proteome analysis in dystrophic mdx mouse muscle reveals a drastic  
780 alteration of key metabolic and contractile proteins after chronic exercise  
781 and the potential modulation by anti-oxidant compounds. *J Proteomics.*  
782 2018; 170:43-58.

- 783 33. Koen AL, Goodman M. Aconitate hydratase isozymes: subcellular location,  
784 tissue distribution and possible subunit structure. *Biochim Biophys Acta*.  
785 1969; 698-701.
- 786 34. Matasova LV, Popova TN. Aconitate hydratase of mammals under  
787 oxidative stress. *Biochem (Mosc)*. 2008; 73(9):957-964.
- 788 35. Päivä H, Thelen KM, Coster RV, Smet J, Paepe BD, Mattila KM, et al.  
789 High-dose statins and skeletal muscle metabolism in humans: a  
790 randomized , controlled trial. *Clin Pharmacol Ther*. 2005; 78(1):60-68.
- 791 36. Marcus F, Gontero B, Harrsch PB, Rittenhouse J. Amino acid sequence  
792 homology among fructose-1,6-bisphosphatases. *Biochem Biophys Res*  
793 *Commun*. 1986; 135(2):374-381.
- 794 37. Wallimann T, Wyss M, Brdiczka D, Nicolay K, Eppenberger HM.  
795 Intracellular compartmentation, structure and function of creatine kinase  
796 isoenzymes in tissues with high and fluctuating energy demands: the  
797 'phosphocreatine circuit' for cellular energy homeostasis. *Biochem J*.  
798 1992; 281:21-40.
- 799 38. Momken I, Lechene P, Koulmann N, Fortin D, Mateo P, Doan BT, et al.  
800 Impaired voluntary running capacity of creatine kinase-deficient mice. *J*  
801 *Physiol* 2005; 565:951–964.
- 802 39. Liu M, Walter GA, Pathare NC, Forster RE, Vandenborne K. A  
803 quantitative study of bioenergetics in skeletal muscle lacking carbonic  
804 anhydrase III using <sup>31</sup>P magnetic resonance spectroscopy. *Proc Natl*  
805 *Acad Sci U S A*. 2007; 104(1):371-376.

- 806 40. Räsänen SR, Lehenkari P, Tasanen M, Rahkila P, Härkönen PL,  
807 Väänänen HK. Carbonic anhydrase III protects cells from hydrogen  
808 peroxide-induced apoptosis. *FASEB J.* 1999; 13:513-522.
- 809 41. Vander Heiden MG, Cantley LC, Thompson CB. Understanding the  
810 Warburg effect: the metabolic requirements of cell proliferation. *Science.*  
811 2009; 324(5930): 1029-1033.
- 812 42. Lunt SY, Vander Heiden MG. Aerobic glycolysis: meeting the metabolic  
813 requirements of cell proliferation. *Annu Rev Cell Dev Biol.* 2011; 27:441-  
814 464.
- 815 43. Doran P, Dowling P, Lohan J, McDonnell K, Poetsch S, Ohlendieck K.  
816 Subproteomics analysis of Ca<sup>2+</sup>-binding proteins demonstrates  
817 decreased calsequestrin expression in dystrophic mouse skeletal muscle.  
818 *Eur J Biochem.* 2004; 271:3943-3952.
- 819 44. Windpassinger C, Schoser B, Straub V, Hochmeister S, Noor A,  
820 Lohberger B, et al. An X-linked myopathy with postural muscle atrophy  
821 and generalized hypertrophy, termed XMPMA, is caused by mutations in  
822 FHL1. *Am J Hum Genet.* 2008; 82:88-99.
- 823 45. Cohen AW, Hnasko R, Schubert W, Lisanti MP. Role of caveolae and  
824 caveolins in health and disease. *Physiol Rev.* 2004; 84:1341-1379.
- 825 46. Han R, Frett EM, Levy JR, Rader EP, Lueck JD, Bansal D, et al. Genetic  
826 ablation of complement C3 attenuates muscle pathology in dysferlin-  
827 deficient mice. *J Clin Investig.* 2010; 120(12):4366-4374.
- 828 47. Zhang C, Wang C, Li Y, Miwa T, Liu C, Cui W, et al. Complement C3a  
829 signaling facilitates skeletal muscle regeneration by regulating monocyte  
830 function and trafficking. *Nat Commun.* 2017; 8:2078.

- 831 48. Lee CS, Yi J, Jung S, Kim B, Lee N, Choo H, et al. TRIM72 negatively  
832 regulates myogenesis via targeting insulin receptor substrate-1. *Cell*  
833 *Death Differ.* 2010; 17:1254-1265.
- 834 49. Wei C, Stock L, Schneider-Gold C, Sommer C, Timchenko NA,  
835 Timchenko L. Reduction of cellular nucleic acid binding protein encoded  
836 by a myotonic dystrophy type 2 gene causes muscle atrophy. *Mol Cell*  
837 *Biol.* 2018. doi:10.1128/MCB.00649-17.
- 838 50. Bachner D, Sedlacek Z, Korn B, Hameister H, Poustka A. Expression  
839 patterns of two human genes coding for different rab GDP-dissociation  
840 inhibitors (GDIs), extremely conserved proteins involved in cellular  
841 transport. *Hum Mol Genet.* 1995; 4(4):701-708.
- 842 51. Kuwabara I, Sano H, Liu F-T. Functions of galectins in cell adhesion and  
843 chemotaxis. *Methods Enzymol.* 2003; 363:532-552.
- 844 52. Clements CM, McNally RS, Conti BJ, Mak TW, Ting JP. DJ-1, a cancer  
845 and Parkinson's disease-associated protein, stabilizes the antioxidant  
846 transcriptional master regulator Nrf2. *Proc Natl Acad Sci U S A.* 2006;  
847 103(41):15091-15096.
- 848 53. Powers SK, Smuder A, Judge A. Oxidative stress and disuse muscle  
849 atrophy: cause or consequence? *Curr Opin Clin Nutr Metab Care.* 2012;  
850 15(3):240-245.
- 851

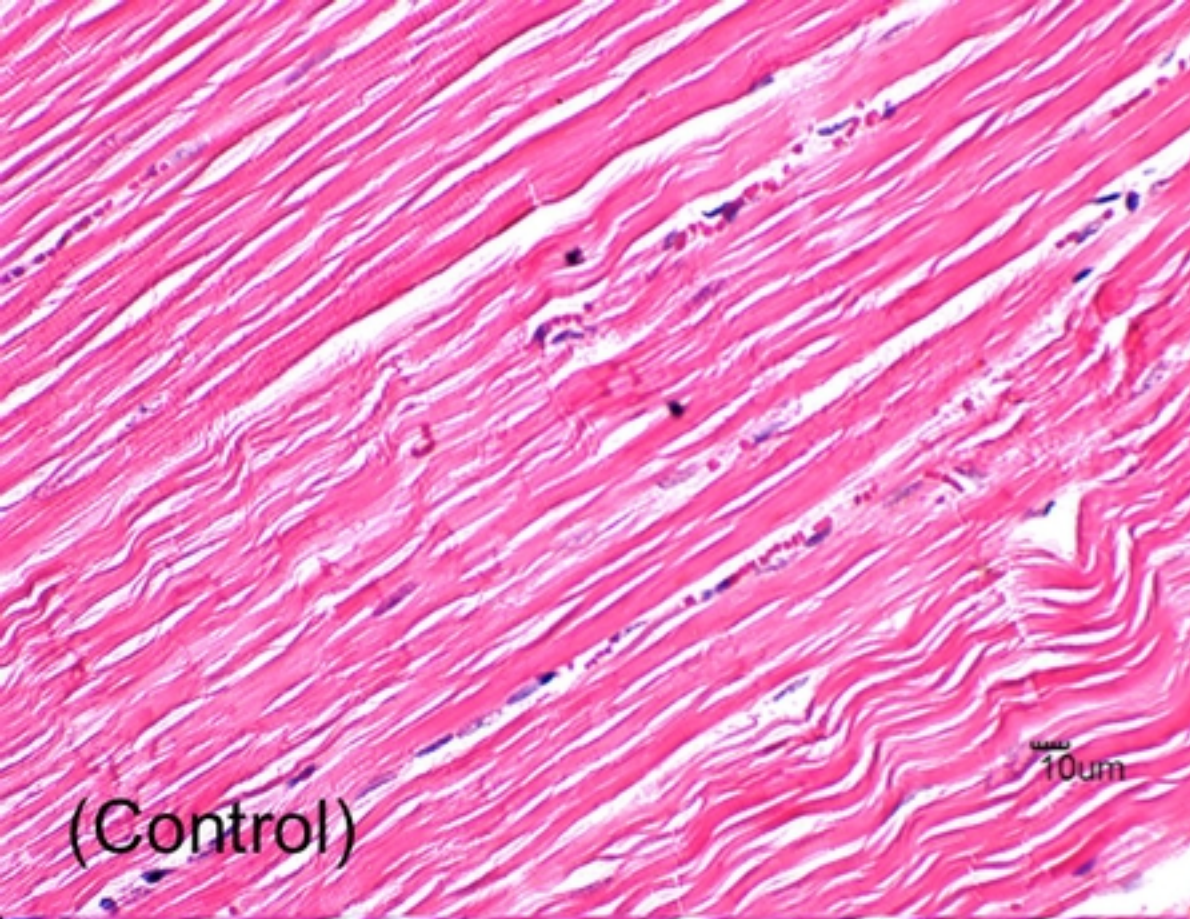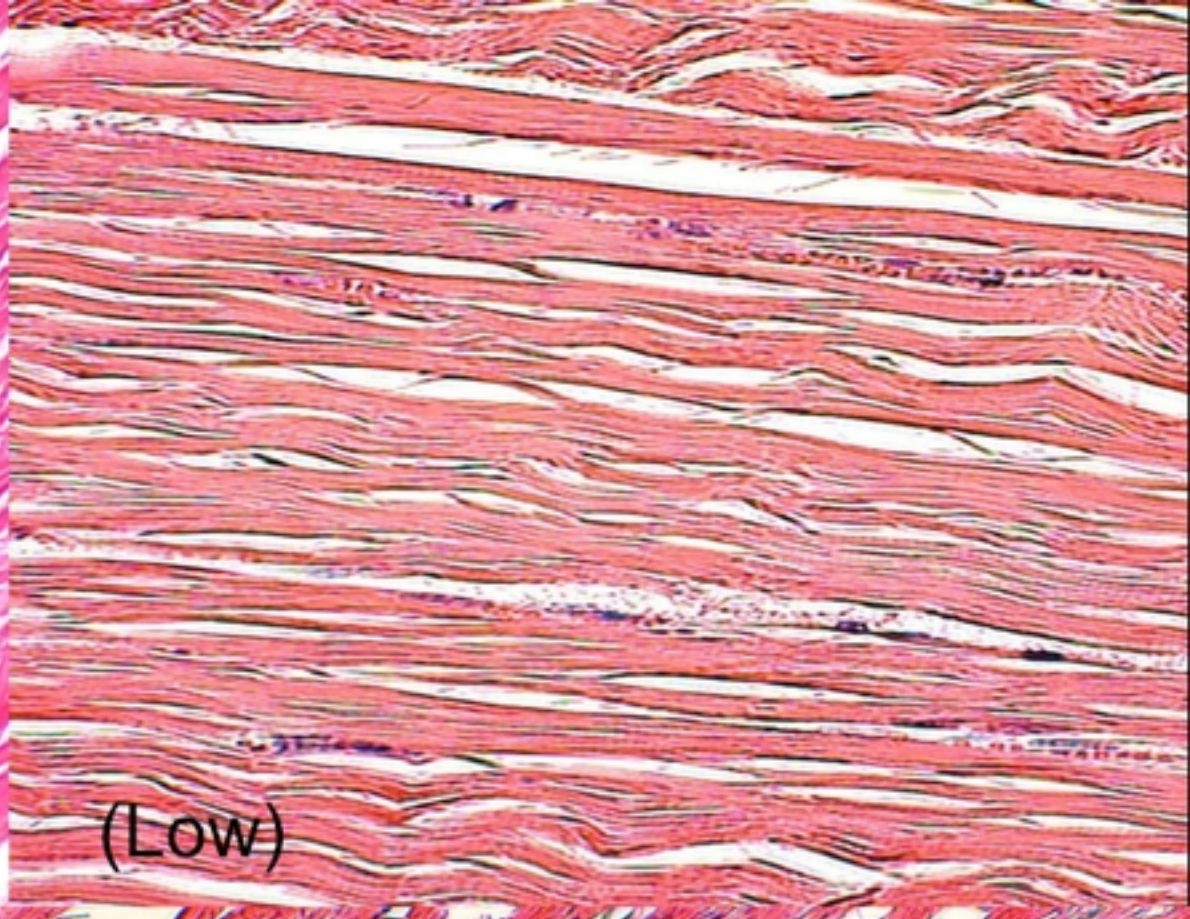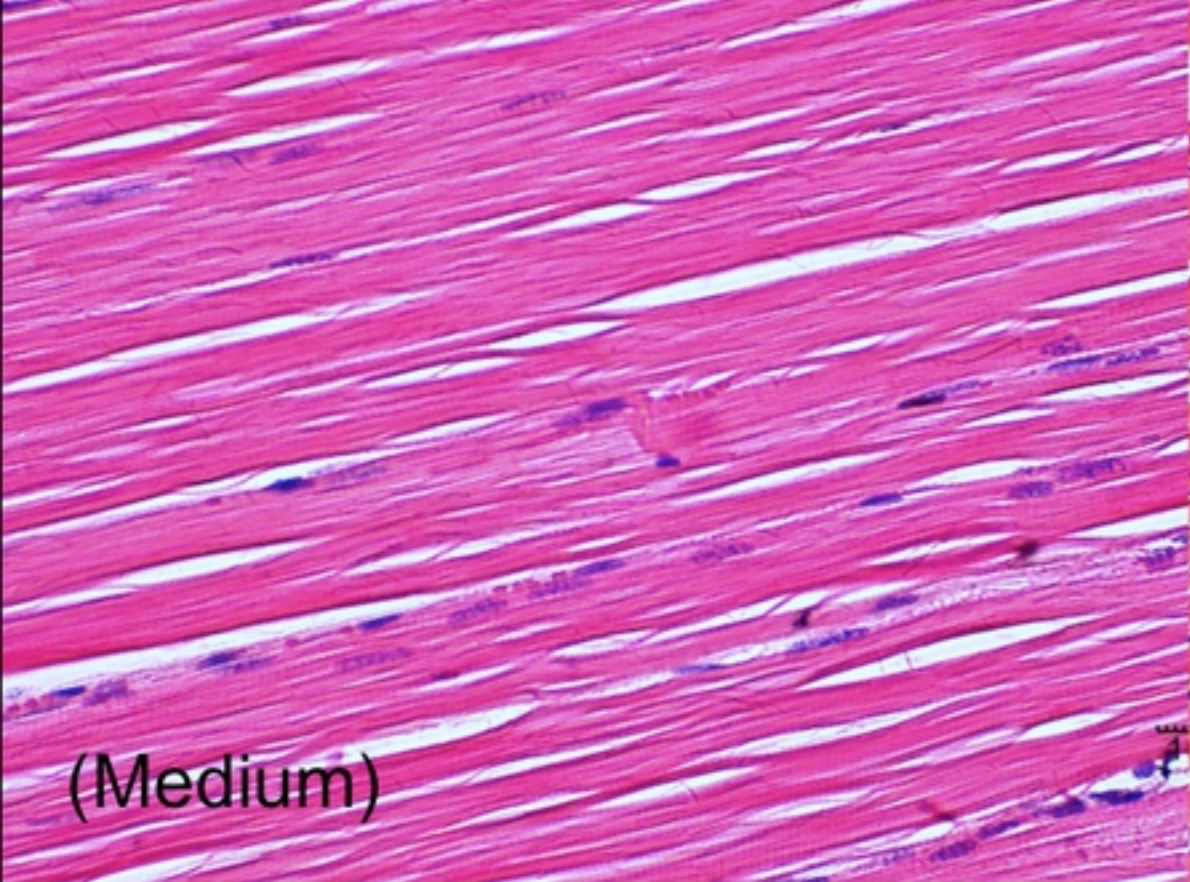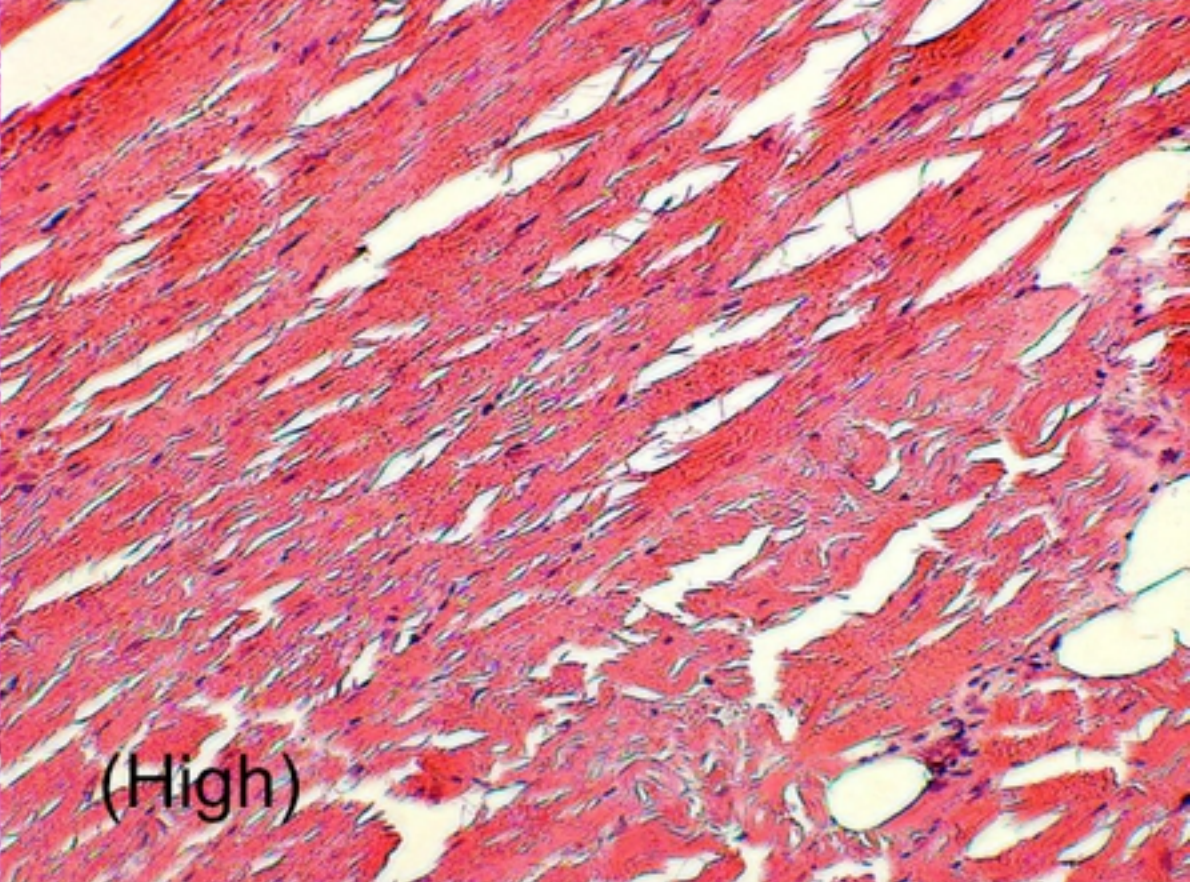

Figure
